# Supplementary material
Source: publisher site journal article supplement (https://www.dovepress.com/get_supplementary_file.php?f=357548.docx)
Supplement: Supplementary file 1 [file get_supplementary_file.php]

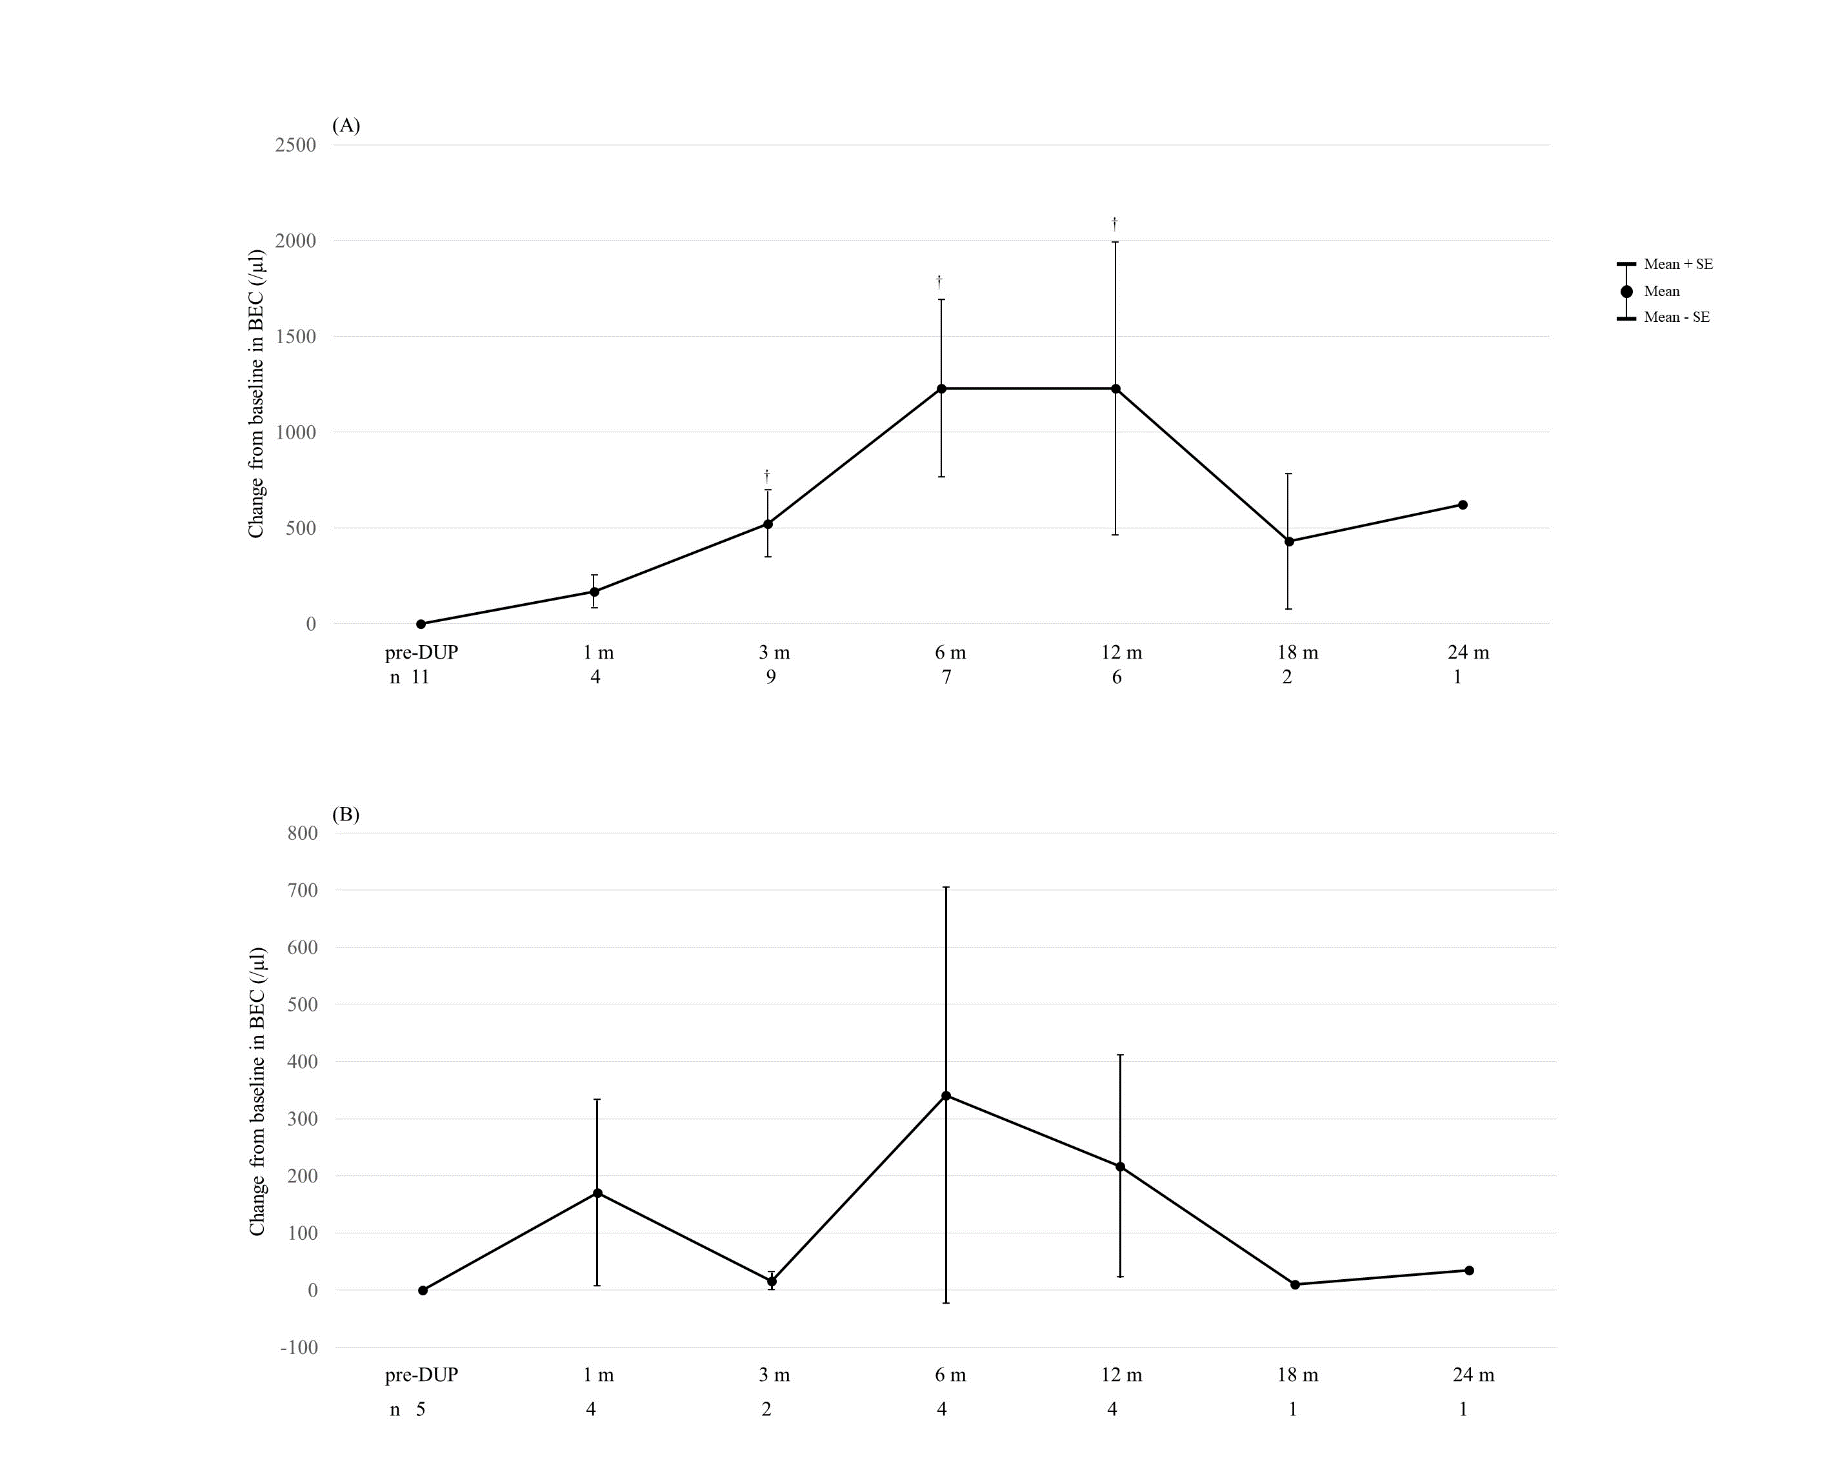
Supplementary Figure 1: The change from baseline in BEC

(A) switching from anti-IL-5/IL-5 receptor antibody

(B) switching from anti-IgE antibody

All data were analyzed using the Wilcoxon signed-rank test. The upper and lower bars represent the standard errors.

†p < 0.05 compared with baseline

Abbreviations: pre-DUP; pretreatment with dupilumab, BEC; blood eosinophil count, m; month(s), n; number of patients for whom clinical data were available.


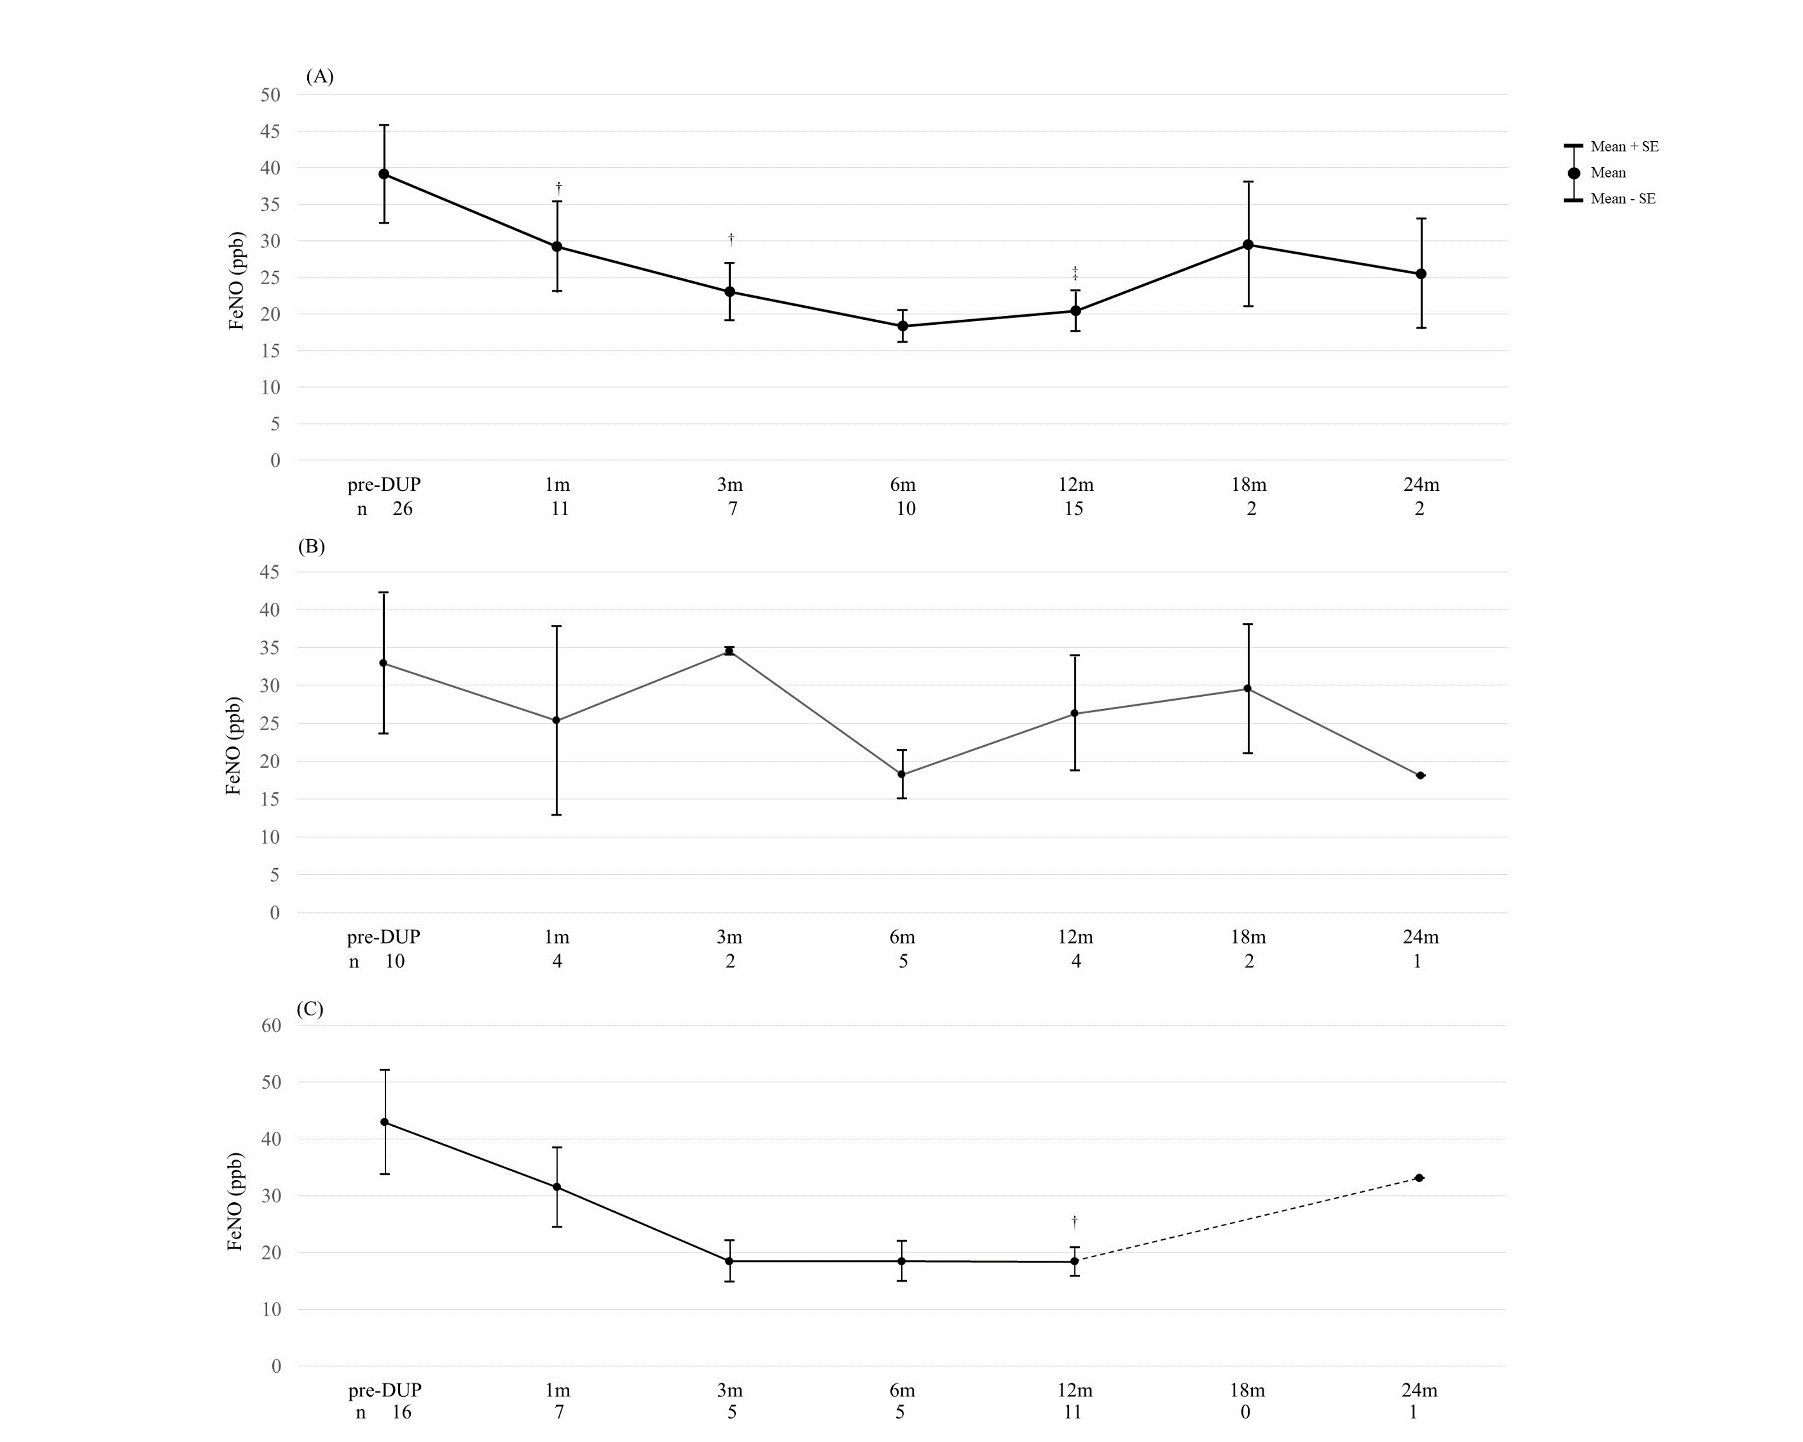


Supplementary Figure 2: The change in FeNO

(A) All patients, (B) Previous biologics (-), (C) Previous biologics (+)

All data were analyzed using the Wilcoxon signed-rank test. The upper and lower bars represent the standard errors.

In supplementary Figure 2(C), since there is no data at 18 months and only one data at 24 months, a dashed line was used to show the change.

†p < 0.05 compared with baseline

‡p < 0.01 compared with baseline

Abbreviations: pre-DUP; pretreatment with dupilumab, FeNO; fraction exhaled nitric oxide, m; month(s), n; number of patients for whom clinical data were available.
